# Supplementary material for: Maladjusted Host Immune Responses Induce Experimental Cerebral Malaria-Like Pathology in a Murine Borrelia and Plasmodium Co-Infection Model
Source: PubMed Central journal article supplement (PMC4116174; doi:10.1371/journal.pone.0103295), 2014-07-30

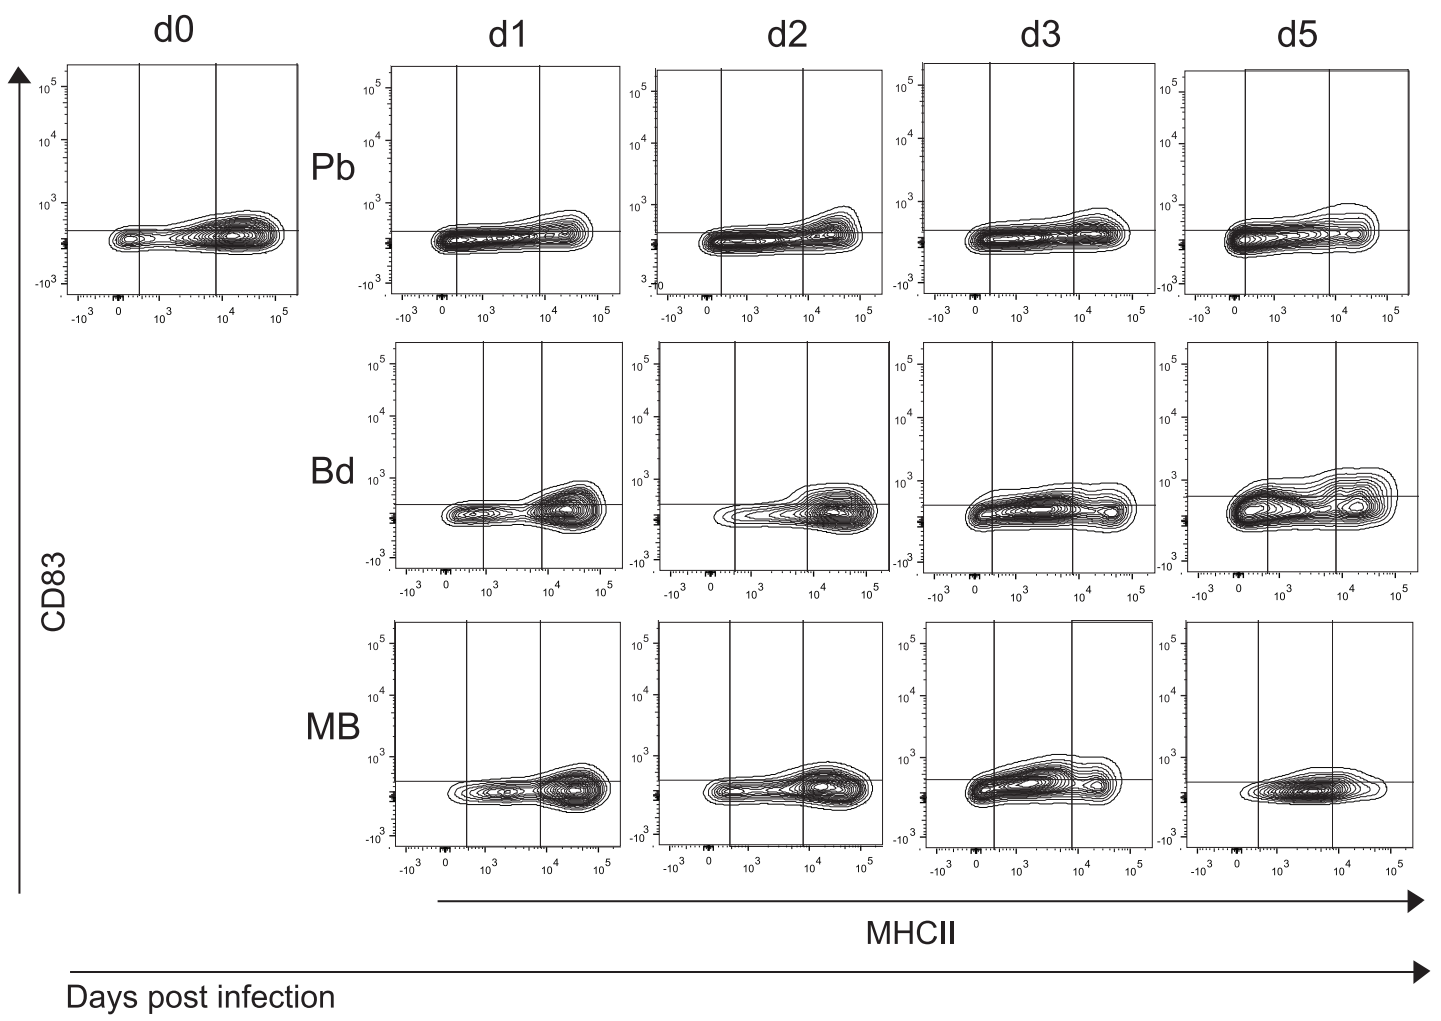

Supplement: pone.0103295.s002.pdf [file pone.0103295.s002.pdf]
