# Supplementary material for: Maladjusted Host Immune Responses Induce Experimental Cerebral Malaria-Like Pathology in a Murine Borrelia and Plasmodium Co-Infection Model
Source: PubMed Central journal article supplement (PMC4116174; doi:10.1371/journal.pone.0103295), 2014-07-30
Supplement: pone.0103295.s004.pdf [file pone.0103295.s004.pdf]

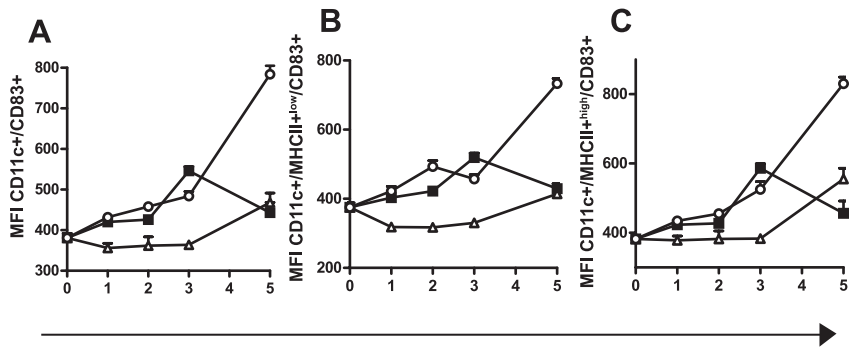

Days post infection

- *P.b/B.d*
- ▲ *P.b*
- *B.d*
