# Supplementary material for: Maladjusted Host Immune Responses Induce Experimental Cerebral Malaria-Like Pathology in a Murine Borrelia and Plasmodium Co-Infection Model
Source: PubMed Central journal article supplement (PMC4116174; doi:10.1371/journal.pone.0103295), 2014-07-30
Supplement: pone.0103295.s006.pdf [file pone.0103295.s006.pdf]

Table S1. Wilcoxon rank test P-value comparisons in Figure 3

**IL-10**

| Timepoint   | Cd0            | Bd1            | Bd3            | Bd5            | Bd8            | Md1            | Md3            | Md5            | Md8            | MBd1           | MBd3           | MBd5           | MBd8           |
|-------------|----------------|----------------|----------------|----------------|----------------|----------------|----------------|----------------|----------------|----------------|----------------|----------------|----------------|
| <b>Cd0</b>  | 1              | 0.57143        | <b>0.00433</b> | 0.24675        | 0.93074        | 1              | <b>0.0303</b>  | <b>0.00866</b> | 0.84127        | <b>0.00433</b> | 0.79221        | 0.93074        | <b>0.00433</b> |
| <b>Bd1</b>  | 0.57143        | 1              | <b>0.02381</b> | 1              | 1              | 0.38095        | 0.16667        | <b>0.02381</b> | 0.25           | <b>0.02381</b> | 0.71429        | 0.54762        | <b>0.02381</b> |
| <b>Bd3</b>  | <b>0.00433</b> | <b>0.02381</b> | 1              | <b>0.00216</b> | <b>0.01515</b> | <b>0.00216</b> | <b>0.00216</b> | <b>0.00216</b> | <b>0.00433</b> | <b>0.00216</b> | <b>0.00216</b> | <b>0.00216</b> | 1              |
| <b>Bd5</b>  | 0.24675        | 1              | <b>0.00216</b> | 1              | 0.81818        | 0.30952        | 0.39394        | <b>0.00216</b> | 0.12554        | <b>0.00216</b> | 0.58874        | 0.30952        | <b>0.00866</b> |
| <b>Bd8</b>  | 0.93074        | 1              | <b>0.01515</b> | 0.81818        | 1              | 0.81818        | 0.48485        | 0.39394        | 0.79221        | 0.06494        | 1              | 0.69913        | <b>0.02597</b> |
| <b>Md1</b>  | 1              | 0.38095        | <b>0.00216</b> | 0.30952        | 0.81818        | 1              | 0.09307        | <b>0.01515</b> | 0.93074        | <b>0.00216</b> | 0.93723        | 0.69913        | <b>0.00433</b> |
| <b>Md3</b>  | <b>0.0303</b>  | 0.16667        | <b>0.00216</b> | 0.39394        | 0.48485        | 0.09307        | 1              | <b>0.00216</b> | <b>0.0303</b>  | <b>0.00216</b> | 0.17965        | 0.30952        | <b>0.01515</b> |
| <b>Md5</b>  | <b>0.00866</b> | <b>0.02381</b> | <b>0.00216</b> | <b>0.00216</b> | 0.39394        | <b>0.01515</b> | <b>0.00216</b> | 1              | <b>0.0303</b>  | <b>0.00216</b> | 0.06494        | 0.39394        | <b>0.00216</b> |
| <b>Md8</b>  | 0.84127        | 0.25           | <b>0.00433</b> | 0.12554        | 0.79221        | 0.93074        | <b>0.0303</b>  | <b>0.0303</b>  | 1              | <b>0.00433</b> | 0.66234        | 0.93074        | <b>0.00433</b> |
| <b>MBd1</b> | <b>0.00433</b> | <b>0.02381</b> | <b>0.00216</b> | <b>0.00216</b> | 0.06494        | <b>0.00216</b> | <b>0.00216</b> | <b>0.00216</b> | <b>0.00433</b> | 1              | <b>0.00216</b> | <b>0.00639</b> | 0.2615         |
| <b>MBd3</b> | 0.79221        | 0.71429        | <b>0.00216</b> | 0.58874        | 1              | 0.93723        | 0.17965        | 0.06494        | 0.66234        | <b>0.00216</b> | 1              | 0.74835        | <b>0.00433</b> |
| <b>MBd5</b> | 0.93074        | 0.54762        | <b>0.00216</b> | 0.30952        | 0.69913        | 0.69913        | 0.30952        | 0.39394        | 0.93074        | <b>0.00639</b> | 0.74835        | 1              | <b>0.00866</b> |
| <b>MBd8</b> | <b>0.00433</b> | <b>0.02381</b> | 1              | <b>0.00866</b> | <b>0.02597</b> | <b>0.00433</b> | <b>0.01515</b> | <b>0.00216</b> | <b>0.00433</b> | 0.2615         | <b>0.00433</b> | <b>0.00866</b> | 1              |

**IL-1beta**

| Timepoint   | Cd0            | Bd1            | Bd3            | Bd5            | Bd8            | Md1            | Md3            | Md5            | Md8            | MBd1           | MBd3           | MBd5           | MBd8           |
|-------------|----------------|----------------|----------------|----------------|----------------|----------------|----------------|----------------|----------------|----------------|----------------|----------------|----------------|
| <b>Cd0</b>  | 1              | 0.57143        | 1              | <b>0.0303</b>  | 0.79221        | 1              | 0.17749        | 0.08225        | 0.05556        | <b>0.00433</b> | 0.79221        | 0.84127        | <b>0.00794</b> |
| <b>Bd1</b>  | 0.57143        | 1              | 0.16667        | <b>0.02381</b> | 0.2619         | 0.38095        | <b>0.02381</b> | <b>0.02381</b> | <b>0.03571</b> | <b>0.02381</b> | 0.71429        | 0.78571        | <b>0.03571</b> |
| <b>Bd3</b>  | 1              | 0.16667        | 1              | <b>0.00216</b> | 0.30952        | 0.69913        | <b>0.00216</b> | <b>0.00216</b> | <b>0.00433</b> | <b>0.00216</b> | 0.69913        | 0.66234        | <b>0.00433</b> |
| <b>Bd5</b>  | <b>0.0303</b>  | <b>0.02381</b> | <b>0.00216</b> | 1              | <b>0.02597</b> | 0.09307        | 0.06494        | 0.48485        | 0.66234        | <b>0.00216</b> | 0.09307        | 0.12554        | <b>0.00433</b> |
| <b>Bd8</b>  | 0.79221        | 0.2619         | 0.30952        | <b>0.02597</b> | 1              | 0.48485        | 0.30952        | <b>0.02597</b> | <b>0.0303</b>  | <b>0.00216</b> | 0.58874        | 0.5368         | <b>0.00866</b> |
| <b>Md1</b>  | 1              | 0.38095        | 0.69913        | 0.09307        | 0.48485        | 1              | 0.09307        | 0.06494        | 0.05195        | <b>0.00216</b> | 0.93723        | 1              | <b>0.00866</b> |
| <b>Md3</b>  | 0.17749        | <b>0.02381</b> | <b>0.00216</b> | 0.06494        | 0.30952        | 0.09307        | 1              | 0.17965        | 0.12554        | <b>0.00216</b> | 0.09307        | 0.12554        | <b>0.00433</b> |
| <b>Md5</b>  | 0.08225        | <b>0.02381</b> | <b>0.00216</b> | 0.48485        | <b>0.02597</b> | 0.06494        | 0.17965        | 1              | 0.66234        | <b>0.00216</b> | 0.06494        | 0.08225        | <b>0.00433</b> |
| <b>Md8</b>  | 0.05556        | <b>0.03571</b> | <b>0.00433</b> | 0.66234        | <b>0.0303</b>  | 0.05195        | 0.12554        | 0.66234        | 1              | <b>0.00433</b> | 0.05195        | 0.09524        | <b>0.00794</b> |
| <b>MBd1</b> | <b>0.00433</b> | <b>0.02381</b> | <b>0.00216</b> | <b>0.00216</b> | <b>0.00216</b> | <b>0.00216</b> | <b>0.00216</b> | <b>0.00216</b> | <b>0.00433</b> | 1              | <b>0.00216</b> | <b>0.01041</b> | 0.46419        |
| <b>MBd3</b> | 0.79221        | 0.71429        | 0.69913        | 0.09307        | 0.58874        | 0.93723        | 0.09307        | 0.06494        | 0.05195        | <b>0.00216</b> | 1              | 1              | <b>0.00866</b> |
| <b>MBd5</b> | 0.84127        | 0.78571        | 0.66234        | 0.12554        | 0.5368         | 1              | 0.12554        | 0.08225        | 0.09524        | <b>0.01041</b> | 1              | 1              | <b>0.03175</b> |
| <b>MBd8</b> | <b>0.00794</b> | <b>0.03571</b> | <b>0.00433</b> | <b>0.00433</b> | <b>0.00866</b> | <b>0.00866</b> | <b>0.00433</b> | <b>0.00433</b> | <b>0.00794</b> | 0.46419        | <b>0.00866</b> | <b>0.03175</b> | 1              |

**TNF-alpha**

| Timepoint   | Cd0            | Bd1            | Bd3            | Bd5            | Bd8            | Md1            | Md3            | Md5            | Md8            | MBd1           | MBd3           | MBd5           | MBd8           |
|-------------|----------------|----------------|----------------|----------------|----------------|----------------|----------------|----------------|----------------|----------------|----------------|----------------|----------------|
| <b>Cd0</b>  | 1              | <b>0.03571</b> | <b>0.00866</b> | 0.42857        | <b>0.00433</b> | <b>0.0303</b>  | 0.5368         | 0.42857        | <b>0.00794</b> | <b>0.00433</b> | 0.24675        | <b>0.00433</b> | <b>0.00794</b> |
| <b>Bd1</b>  | <b>0.03571</b> | 1              | 0.09524        | <b>0.02381</b> | 0.09524        | 1              | <b>0.02381</b> | <b>0.04762</b> | <b>0.03571</b> | <b>0.02381</b> | 0.2619         | <b>0.04762</b> | <b>0.03571</b> |
| <b>Bd3</b>  | <b>0.00866</b> | 0.09524        | 1              | <b>0.00216</b> | <b>0.00216</b> | 0.30952        | <b>0.04113</b> | <b>0.02597</b> | <b>0.00433</b> | <b>0.00216</b> | 1              | <b>0.00216</b> | <b>0.00433</b> |
| <b>Bd5</b>  | 0.42857        | <b>0.02381</b> | <b>0.00216</b> | 1              | <b>0.00216</b> | <b>0.00433</b> | 0.09307        | 0.69913        | <b>0.00433</b> | <b>0.00216</b> | 0.09307        | <b>0.00216</b> | <b>0.00433</b> |
| <b>Bd8</b>  | <b>0.00433</b> | 0.09524        | <b>0.00216</b> | <b>0.00216</b> | 1              | 0.13203        | <b>0.00216</b> | <b>0.00216</b> | 0.66234        | 0.58874        | <b>0.01515</b> | 0.69913        | <b>0.01732</b> |
| <b>Md1</b>  | <b>0.0303</b>  | 1              | 0.30952        | <b>0.00433</b> | 0.13203        | 1              | <b>0.04113</b> | <b>0.01515</b> | <b>0.00433</b> | <b>0.00216</b> | 0.30952        | <b>0.01515</b> | <b>0.00433</b> |
| <b>Md3</b>  | 0.5368         | <b>0.02381</b> | <b>0.04113</b> | 0.09307        | <b>0.00216</b> | <b>0.04113</b> | 1              | 0.24026        | <b>0.00433</b> | <b>0.00216</b> | 0.39394        | <b>0.00216</b> | <b>0.00433</b> |
| <b>Md5</b>  | 0.42857        | <b>0.04762</b> | <b>0.02597</b> | 0.69913        | <b>0.00216</b> | <b>0.01515</b> | 0.24026        | 1              | <b>0.00433</b> | <b>0.00216</b> | 0.13203        | <b>0.00216</b> | <b>0.00433</b> |
| <b>Md8</b>  | <b>0.00794</b> | <b>0.03571</b> | <b>0.00433</b> | <b>0.00433</b> | 0.66234        | <b>0.00433</b> | <b>0.00433</b> | <b>0.00433</b> | 1              | 0.66234        | <b>0.00433</b> | 0.79221        | <b>0.01587</b> |
| <b>MBd1</b> | <b>0.00433</b> | <b>0.02381</b> | <b>0.00216</b> | <b>0.00216</b> | 0.58874        | <b>0.00216</b> | <b>0.00216</b> | <b>0.00216</b> | 0.66234        | 1              | <b>0.00216</b> | 1              | <b>0.00866</b> |
| <b>MBd3</b> | 0.24675        | 0.2619         | 1              | 0.09307        | <b>0.01515</b> | 0.30952        | 0.39394        | 0.13203        | <b>0.00433</b> | <b>0.00216</b> | 1              | <b>0.00433</b> | <b>0.00433</b> |
| <b>MBd5</b> | <b>0.00433</b> | <b>0.04762</b> | <b>0.00216</b> | <b>0.00216</b> | 0.69913        | <b>0.01515</b> | <b>0.00216</b> | <b>0.00216</b> | 0.79221        | 1              | <b>0.00433</b> | 1              | <b>0.00866</b> |
| <b>MBd8</b> | <b>0.00794</b> | <b>0.03571</b> | <b>0.00433</b> | <b>0.00433</b> | <b>0.01732</b> | <b>0.00433</b> | <b>0.00433</b> | <b>0.00433</b> | <b>0.01587</b> | <b>0.00866</b> | <b>0.00433</b> | <b>0.00866</b> | 1              |

**CD4+/CD25<sup>high</sup>/FoxP3+**

| Timepoint   | Cd0            | Bd1            | Bd2            | Bd3            | Bd5            | Md1            | Md2            | Md3            | Md5            | MBd1           | MBd2           | MBd3           | MBd5           |
|-------------|----------------|----------------|----------------|----------------|----------------|----------------|----------------|----------------|----------------|----------------|----------------|----------------|----------------|
| <b>Cd0</b>  | 1              | <b>0.00866</b> | <b>0.00216</b> | <b>0.00216</b> | <b>0.00216</b> | <b>0.00216</b> | <b>0.00216</b> | <b>0.005</b>   | <b>0.00216</b> | 0.39394        | 0.24026        | <b>0.00216</b> | <b>0.00216</b> |
| <b>Bd1</b>  | <b>0.00866</b> | 1              | <b>0.00216</b> | <b>0.00216</b> | <b>0.00216</b> | <b>0.00866</b> | <b>0.00433</b> | 0.17273        | <b>0.00216</b> | <b>0.02597</b> | <b>0.00216</b> | 0.09307        | <b>0.04113</b> |
| <b>Bd2</b>  | <b>0.00216</b> | <b>0.00216</b> | 1              | <b>0.00216</b> | <b>0.00216</b> | <b>0.00216</b> | <b>0.00216</b> | <b>0.005</b>   | <b>0.00216</b> | <b>0.04113</b> | 0.09307        | <b>0.00216</b> | <b>0.00216</b> |
| <b>Bd3</b>  | <b>0.00216</b> | <b>0.00216</b> | <b>0.00216</b> | 1              | <b>0.00433</b> | <b>0.00216</b> | <b>0.00216</b> | <b>0.005</b>   | <b>0.00216</b> | <b>0.00216</b> | <b>0.00216</b> | <b>0.00216</b> | <b>0.00216</b> |
| <b>Bd5</b>  | <b>0.00216</b> | <b>0.00216</b> | <b>0.00216</b> | <b>0.00433</b> | 1              | <b>0.00216</b> | <b>0.00216</b> | <b>0.005</b>   | <b>0.00216</b> | <b>0.00216</b> | <b>0.00216</b> | <b>0.00216</b> | <b>0.00216</b> |
| <b>Md1</b>  | <b>0.00216</b> | <b>0.00866</b> | <b>0.00216</b> | <b>0.00216</b> | <b>0.00216</b> | 1              | 0.39394        | <b>0.01291</b> | <b>0.00866</b> | <b>0.00216</b> | <b>0.00216</b> | 0.06494        | 0.39394        |
| <b>Md2</b>  | <b>0.00216</b> | <b>0.00433</b> | <b>0.00216</b> | <b>0.00216</b> | <b>0.00216</b> | 0.39394        | 1              | <b>0.005</b>   | 0.30952        | <b>0.00216</b> | <b>0.00216</b> | <b>0.01515</b> | 0.13203        |
| <b>Md3</b>  | <b>0.005</b>   | 0.17273        | <b>0.005</b>   | <b>0.005</b>   | <b>0.005</b>   | <b>0.01291</b> | <b>0.005</b>   | 1              | <b>0.005</b>   | <b>0.01291</b> | <b>0.005</b>   | 0.93607        | 0.22895        |
| <b>Md5</b>  | <b>0.00216</b> | <b>0.00216</b> | <b>0.00216</b> | <b>0.00216</b> | <b>0.00216</b> | <b>0.00866</b> | 0.30952        | <b>0.005</b>   | 1              | <b>0.00216</b> | <b>0.00216</b> | <b>0.00433</b> | 0.06494        |
| <b>MBd1</b> | 0.39394        | <b>0.02597</b> | <b>0.04113</b> | <b>0.00216</b> | <b>0.00216</b> | <b>0.00216</b> | <b>0.00216</b> | <b>0.01291</b> | <b>0.00216</b> | 1              | 1              | <b>0.00866</b> | <b>0.00216</b> |
| <b>MBd2</b> | 0.24026        | <b>0.00216</b> | 0.09307        | <b>0.00216</b> | <b>0.00216</b> | <b>0.00216</b> | <b>0.00216</b> | <b>0.005</b>   | <b>0.00216</b> | 1              | 1              | <b>0.00216</b> | <b>0.00216</b> |
| <b>MBd3</b> | <b>0.00216</b> | 0.09307        | <b>0.00216</b> | <b>0.00216</b> | <b>0.00216</b> | 0.06494        | <b>0.01515</b> | 0.93607        | <b>0.00433</b> | <b>0.00866</b> | <b>0.00216</b> | 1              | 0.30952        |
| <b>MBd5</b> | <b>0.00216</b> | <b>0.04113</b> | <b>0.00216</b> | <b>0.00216</b> | <b>0.00216</b> | 0.39394        | 0.13203        | 0.22895        | 0.06494        | <b>0.00216</b> | <b>0.00216</b> | 0.30952        | 1              |
