# Supplementary material for: Maladjusted Host Immune Responses Induce Experimental Cerebral Malaria-Like Pathology in a Murine Borrelia and Plasmodium Co-Infection Model
Source: PubMed Central journal article supplement (PMC4116174; doi:10.1371/journal.pone.0103295), 2014-07-30
Supplement: pone.0103295.s007.pdf [file pone.0103295.s007.pdf]

Table S2. Wilcoxon rank test P-value comparisons in Figure 4

**Fq CD11c+/MHCII+**

| Timepoint | Cd0            | Bd1            | Bd2            | Bd3            | Bd5            | Md1            | Md2            | Md3            | Md5            | MBd1           | MBd2           | MBd3           | MBd5           |
|-----------|----------------|----------------|----------------|----------------|----------------|----------------|----------------|----------------|----------------|----------------|----------------|----------------|----------------|
| Cd0       | 1              | 0.24026        | <b>0.005</b>   | 0.69913        | <b>0.00216</b> | 0.33241        | 0.58874        | 0.69913        | 0.09307        | 0.06508        | <b>0.00433</b> | 1              | 0.09213        |
| Bd1       | 0.24026        | 1              | <b>0.005</b>   | 0.68788        | <b>0.00216</b> | 0.5745         | 1              | 0.13203        | 0.09307        | <b>0.01291</b> | <b>0.00216</b> | 0.1994         | 0.06508        |
| Bd2       | <b>0.005</b>   | <b>0.005</b>   | 1              | <b>0.005</b>   | <b>0.005</b>   | <b>0.00492</b> | <b>0.005</b>   | <b>0.005</b>   | <b>0.005</b>   | <b>0.01981</b> | <b>0.00813</b> | <b>0.005</b>   | 0.3768         |
| Bd3       | 0.69913        | 0.68788        | <b>0.005</b>   | 1              | <b>0.00216</b> | 1              | 0.80953        | 0.63036        | <b>0.04113</b> | <b>0.03035</b> | <b>0.02597</b> | 0.58874        | <b>0.04495</b> |
| Bd5       | <b>0.00216</b> | <b>0.00216</b> | <b>0.005</b>   | <b>0.00216</b> | 1              | <b>0.005</b>   | <b>0.00216</b> | <b>0.00216</b> | <b>0.00433</b> | <b>0.005</b>   | <b>0.00216</b> | <b>0.00216</b> | <b>0.005</b>   |
| Md1       | 0.33241        | 0.5745         | <b>0.00492</b> | 1              | <b>0.005</b>   | 1              | 0.5745         | 0.17273        | <b>0.04495</b> | <b>0.00492</b> | <b>0.005</b>   | 0.22731        | <b>0.04458</b> |
| Md2       | 0.58874        | 1              | <b>0.005</b>   | 0.80953        | <b>0.00216</b> | 0.5745         | 1              | 0.48485        | <b>0.02597</b> | <b>0.03035</b> | <b>0.01515</b> | 0.58874        | <b>0.03671</b> |
| Md3       | 0.69913        | 0.13203        | <b>0.005</b>   | 0.63036        | <b>0.00216</b> | 0.17273        | 0.48485        | 1              | <b>0.01515</b> | 0.09213        | <b>0.03006</b> | 0.81818        | 0.09213        |
| Md5       | 0.09307        | 0.09307        | <b>0.005</b>   | <b>0.04113</b> | <b>0.00433</b> | <b>0.04495</b> | <b>0.02597</b> | <b>0.01515</b> | 1              | <b>0.005</b>   | <b>0.00216</b> | <b>0.00866</b> | <b>0.00813</b> |
| MBd1      | 0.06508        | <b>0.01291</b> | <b>0.01981</b> | <b>0.03035</b> | <b>0.005</b>   | <b>0.00492</b> | <b>0.03035</b> | 0.09213        | <b>0.005</b>   | 1              | 0.29711        | <b>0.03035</b> | 0.57383        |
| MBd2      | <b>0.00433</b> | <b>0.00216</b> | <b>0.00813</b> | <b>0.02597</b> | <b>0.00216</b> | <b>0.005</b>   | <b>0.01515</b> | <b>0.03006</b> | <b>0.00216</b> | 0.29711        | 1              | <b>0.00216</b> | 0.5745         |
| MBd3      | 1              | 0.1994         | <b>0.005</b>   | 0.58874        | <b>0.00216</b> | 0.22731        | 0.58874        | 0.81818        | <b>0.00866</b> | <b>0.03035</b> | <b>0.00216</b> | 1              | 0.09213        |
| MBd5      | 0.09213        | 0.06508        | 0.3768         | <b>0.04495</b> | <b>0.005</b>   | <b>0.04458</b> | <b>0.03671</b> | 0.09213        | <b>0.00813</b> | 0.57383        | 0.5745         | 0.09213        | 1              |

**Fq CD11c+/MHCII+/MHCII+<sup>high</sup>**

| Timepoint | Cd0            | Bd1            | Bd2            | Bd3            | Bd5            | Md1            | Md2            | Md3            | Md5            | MBd1           | MBd2           | MBd3           | MBd5           |
|-----------|----------------|----------------|----------------|----------------|----------------|----------------|----------------|----------------|----------------|----------------|----------------|----------------|----------------|
| Cd0       | 1              | <b>0.00216</b> | <b>0.00216</b> | <b>0.00216</b> | <b>0.00216</b> | <b>0.00216</b> | <b>0.00216</b> | <b>0.00216</b> | <b>0.00216</b> | 1              | 0.06494        | <b>0.00216</b> | <b>0.00216</b> |
| Bd1       | <b>0.00216</b> | 1              | 0.42253        | <b>0.00216</b> | <b>0.00216</b> | <b>0.00216</b> | <b>0.00216</b> | <b>0.00216</b> | <b>0.00216</b> | <b>0.00433</b> | <b>0.02597</b> | <b>0.00216</b> | <b>0.00216</b> |
| Bd2       | <b>0.00216</b> | 0.42253        | 1              | <b>0.00216</b> | <b>0.00216</b> | <b>0.00216</b> | <b>0.00216</b> | <b>0.00216</b> | <b>0.00216</b> | <b>0.00433</b> | <b>0.00216</b> | <b>0.00216</b> | <b>0.00216</b> |
| Bd3       | <b>0.00216</b> | <b>0.00216</b> | <b>0.00216</b> | 1              | <b>0.00216</b> | 0.13203        | 0.93723        | 0.30952        | <b>0.00216</b> | <b>0.00216</b> | <b>0.00216</b> | 0.69913        | 0.69913        |
| Bd5       | <b>0.00216</b> | <b>0.00216</b> | <b>0.00216</b> | <b>0.00216</b> | 1              | <b>0.00216</b> | <b>0.00216</b> | <b>0.00216</b> | <b>0.00216</b> | <b>0.00216</b> | <b>0.00216</b> | <b>0.00216</b> | <b>0.01515</b> |
| Md1       | <b>0.00216</b> | <b>0.00216</b> | <b>0.00216</b> | 0.13203        | <b>0.00216</b> | 1              | 0.17965        | <b>0.04113</b> | <b>0.01515</b> | <b>0.00216</b> | <b>0.00216</b> | 0.48485        | 0.81818        |
| Md2       | <b>0.00216</b> | <b>0.00216</b> | <b>0.00216</b> | 0.93723        | <b>0.00216</b> | 0.17965        | 1              | 0.39394        | <b>0.00866</b> | <b>0.00216</b> | <b>0.00216</b> | 0.81818        | 1              |
| Md3       | <b>0.00216</b> | <b>0.00216</b> | <b>0.00216</b> | 0.30952        | <b>0.00216</b> | <b>0.04113</b> | 0.39394        | 1              | <b>0.00216</b> | <b>0.00216</b> | <b>0.00216</b> | 0.24026        | 0.48485        |
| Md5       | <b>0.00216</b> | <b>0.00216</b> | <b>0.00216</b> | <b>0.00216</b> | <b>0.00216</b> | <b>0.01515</b> | <b>0.00866</b> | <b>0.00216</b> | 1              | <b>0.00216</b> | <b>0.00216</b> | <b>0.01515</b> | 0.17965        |
| MBd1      | 1              | <b>0.00433</b> | <b>0.00433</b> | <b>0.00216</b> | <b>0.00216</b> | <b>0.00216</b> | <b>0.00216</b> | <b>0.00216</b> | <b>0.00216</b> | 1              | 0.39394        | <b>0.00216</b> | <b>0.00216</b> |
| MBd2      | 0.06494        | <b>0.02597</b> | <b>0.00216</b> | <b>0.00216</b> | <b>0.00216</b> | <b>0.00216</b> | <b>0.00216</b> | <b>0.00216</b> | <b>0.00216</b> | 0.39394        | 1              | <b>0.00216</b> | <b>0.00216</b> |
| MBd3      | <b>0.00216</b> | <b>0.00216</b> | <b>0.00216</b> | 0.69913        | <b>0.00216</b> | 0.48485        | 0.81818        | 0.24026        | <b>0.01515</b> | <b>0.00216</b> | <b>0.00216</b> | 1              | 0.93723        |
| MBd5      | <b>0.00216</b> | <b>0.00216</b> | <b>0.00216</b> | 0.69913        | <b>0.01515</b> | 0.81818        | 1              | 0.48485        | 0.17965        | <b>0.00216</b> | <b>0.00216</b> | 0.93723        | 1              |

**Fq CD11c+/CD83+**

| Timepoint | Cd0            | Bd1            | Bd2            | Bd3            | Bd5            | Md1            | Md2            | Md3            | Md5            | MBd1           | MBd2           | MBd3           | MBd5           |
|-----------|----------------|----------------|----------------|----------------|----------------|----------------|----------------|----------------|----------------|----------------|----------------|----------------|----------------|
| Cd0       | 1              | 0.13203        | 1              | <b>0.01515</b> | <b>0.00433</b> | <b>0.00433</b> | <b>0.00866</b> | <b>0.01515</b> | 0.87256        | <b>0.00216</b> | <b>0.02447</b> | 0.06494        | 0.06508        |
| Bd1       | 0.13203        | 1              | 0.69913        | 0.24026        | <b>0.04113</b> | <b>0.00216</b> | <b>0.00216</b> | <b>0.00216</b> | 0.24026        | <b>0.00216</b> | <b>0.005</b>   | 0.58874        | <b>0.005</b>   |
| Bd2       | 1              | 0.69913        | 1              | <b>0.02597</b> | <b>0.02597</b> | <b>0.01515</b> | <b>0.04113</b> | <b>0.04113</b> | 0.81818        | <b>0.01027</b> | 0.09213        | 0.58874        | 0.06508        |
| Bd3       | <b>0.01515</b> | 0.24026        | <b>0.02597</b> | 1              | 0.81818        | <b>0.00216</b> | <b>0.00216</b> | <b>0.00216</b> | <b>0.01515</b> | <b>0.00216</b> | <b>0.005</b>   | 0.24026        | <b>0.005</b>   |
| Bd5       | <b>0.00433</b> | <b>0.04113</b> | <b>0.02597</b> | 0.81818        | 1              | <b>0.00216</b> | <b>0.00216</b> | <b>0.00216</b> | <b>0.01027</b> | <b>0.00216</b> | <b>0.005</b>   | 0.10869        | <b>0.005</b>   |
| Md1       | <b>0.00433</b> | <b>0.00216</b> | <b>0.01515</b> | <b>0.00216</b> | <b>0.00216</b> | 1              | 0.48485        | 0.30952        | <b>0.00866</b> | 0.69913        | 0.12754        | <b>0.00216</b> | 0.22895        |
| Md2       | <b>0.00866</b> | <b>0.00216</b> | <b>0.04113</b> | <b>0.00216</b> | <b>0.00216</b> | 0.48485        | 1              | 0.74835        | <b>0.01515</b> | 0.10869        | 0.17273        | <b>0.00216</b> | 0.80985        |
| Md3       | <b>0.01515</b> | <b>0.00216</b> | <b>0.04113</b> | <b>0.00216</b> | <b>0.00216</b> | 0.30952        | 0.74835        | 1              | <b>0.02472</b> | <b>0.02597</b> | 0.22895        | <b>0.00216</b> | 0.93607        |
| Md5       | 0.87256        | 0.24026        | 0.81818        | <b>0.01515</b> | <b>0.01027</b> | <b>0.00866</b> | <b>0.01515</b> | <b>0.02472</b> | 1              | <b>0.00433</b> | 0.06508        | 0.12687        | 0.06508        |
| MBd1      | <b>0.00216</b> | <b>0.00216</b> | <b>0.01027</b> | <b>0.00216</b> | <b>0.00216</b> | 0.69913        | 0.10869        | <b>0.02597</b> | <b>0.00433</b> | 1              | <b>0.02002</b> | <b>0.00216</b> | <b>0.03035</b> |
| MBd2      | <b>0.02447</b> | <b>0.005</b>   | 0.09213        | <b>0.005</b>   | <b>0.005</b>   | 0.12754        | 0.17273        | 0.22895        | 0.06508        | <b>0.02002</b> | 1              | <b>0.00813</b> | 0.42089        |
| MBd3      | 0.06494        | 0.58874        | 0.58874        | 0.24026        | 0.10869        | <b>0.00216</b> | <b>0.00216</b> | <b>0.00216</b> | 0.12687        | <b>0.00216</b> | <b>0.00813</b> | 1              | <b>0.00813</b> |
| MBd5      | 0.06508        | <b>0.005</b>   | 0.06508        | <b>0.005</b>   | <b>0.005</b>   | 0.22895        | 0.80985        | 0.93607        | 0.06508        | <b>0.03035</b> | 0.42089        | <b>0.00813</b> | 1              |

**Fq CD11c+/MHCII+<sup>low</sup>/CD83+**

| Timepoint | Cd0            | Bd1            | Bd2            | Bd3            | Bd5            | Md1            | Md2            | Md3            | Md5            | MBd1           | MBd2           | MBd3           | MBd5           |
|-----------|----------------|----------------|----------------|----------------|----------------|----------------|----------------|----------------|----------------|----------------|----------------|----------------|----------------|
| Cd0       | 1              | 0.48485        | 0.48485        | <b>0.02597</b> | <b>0.00216</b> | <b>0.00492</b> | <b>0.00216</b> | <b>0.00216</b> | <b>0.005</b>   | <b>0.00216</b> | <b>0.04113</b> | <b>0.00866</b> | 0.13203        |
| Bd1       | 0.48485        | 1              | 0.93723        | <b>0.01515</b> | <b>0.00216</b> | <b>0.01981</b> | <b>0.01027</b> | 0.10869        | <b>0.005</b>   | <b>0.00433</b> | 0.33582        | 0.09307        | 0.58874        |
| Bd2       | 0.48485        | 0.93723        | 1              | <b>0.01515</b> | <b>0.00216</b> | <b>0.00492</b> | <b>0.00216</b> | <b>0.00866</b> | <b>0.005</b>   | <b>0.00216</b> | 0.09307        | <b>0.00866</b> | 0.24026        |
| Bd3       | <b>0.02597</b> | <b>0.01515</b> | <b>0.01515</b> | 1              | 0.63036        | <b>0.00492</b> | <b>0.00216</b> | <b>0.00216</b> | <b>0.02002</b> | <b>0.00216</b> | <b>0.00433</b> | 0.30952        | <b>0.00433</b> |
| Bd5       | <b>0.00216</b> | <b>0.00216</b> | <b>0.00216</b> | 0.63036        | 1              | <b>0.00492</b> | <b>0.00216</b> | <b>0.00216</b> | <b>0.02002</b> | <b>0.00216</b> | <b>0.00216</b> | 0.06494        | <b>0.00216</b> |
| Md1       | <b>0.00492</b> | <b>0.01981</b> | <b>0.00492</b> | <b>0.00492</b> | <b>0.00492</b> | 1              | 0.57383        | <b>0.04458</b> | <b>0.00485</b> | 0.12687        | 0.12687        | <b>0.00492</b> | <b>0.01575</b> |
| Md2       | <b>0.00216</b> | <b>0.01027</b> | <b>0.00216</b> | <b>0.00216</b> | <b>0.00216</b> | 0.57383        | 1              | <b>0.02472</b> | <b>0.005</b>   | 0.14883        | <b>0.02472</b> | <b>0.00216</b> | <b>0.00433</b> |
| Md3       | <b>0.00216</b> | 0.10869        | <b>0.00866</b> | <b>0.00216</b> | <b>0.00216</b> | <b>0.04458</b> | <b>0.02472</b> | 1              | <b>0.005</b>   | <b>0.00866</b> | 0.58874        | <b>0.00216</b> | 0.24026        |
| Md5       | <b>0.005</b>   | <b>0.005</b>   | <b>0.005</b>   | <b>0.02002</b> | <b>0.02002</b> | <b>0.00485</b> | <b>0.005</b>   | <b>0.005</b>   | 1              | <b>0.005</b>   | <b>0.005</b>   | <b>0.02002</b> | <b>0.005</b>   |
| MBd1      | <b>0.00216</b> | <b>0.00433</b> | <b>0.00216</b> | <b>0.00216</b> | <b>0.00216</b> | 0.12687        | 0.14883        | <b>0.00866</b> | <b>0.005</b>   | 1              | <b>0.01515</b> | <b>0.00216</b> | <b>0.00433</b> |
| MBd2      | <b>0.04113</b> | 0.33582        | 0.09307        | <b>0.00433</b> | <b>0.00216</b> | 0.12687        | <b>0.02472</b> | 0.58874        | <b>0.005</b>   | <b>0.01515</b> | 1              | <b>0.00216</b> | 0.58874        |
| MBd3      | <b>0.00866</b> | 0.09307        | <b>0.00866</b> | 0.30952        | 0.06494        | <b>0.00492</b> | <b>0.00216</b> | <b>0.00216</b> | <b>0.02002</b> | <b>0.00216</b> | <b>0.00216</b> | 1              | <b>0.00866</b> |
| MBd5      | 0.13203        | 0.58874        | 0.24026        | <b>0.00433</b> | <b>0.00216</b> | <b>0.01575</b> | <b>0.00433</b> | 0.24026        | <b>0.005</b>   | <b>0.00433</b> | 0.58874        | <b>0.00866</b> | 1              |

**Fq CD11c+/MHCII+<sup>high</sup>/CD83+**

| Timepoint | Cd0     | Bd1     | Bd2     | Bd3            | Bd5            | Md1     | Md2     | Md3     | Md5            | MBd1           | MBd2           | MBd3           | MBd5    |
|-----------|---------|---------|---------|----------------|----------------|---------|---------|---------|----------------|----------------|----------------|----------------|---------|
| Cd0       | 1       | 0.07765 | 0.6884  | <b>0.005</b>   | <b>0.00216</b> | 0.13203 | 0.06494 | 0.24026 | <b>0.00216</b> | <b>0.00216</b> | <b>0.00216</b> | <b>0.005</b>   | 0.17273 |
| Bd1       | 0.07765 | 1       | 0.22895 | <b>0.01291</b> | <b>0.00216</b> | 0.81818 | 0.39394 | 0.58874 | <b>0.00216</b> | <b>0.00216</b> | <b>0.00216</b> | <b>0.01014</b> | 0.06508 |
| Bd2       | 0.6884  |         |         |                |                |         |         |         |                |                |                |                |         |
