# Supplementary material for: Maladjusted Host Immune Responses Induce Experimental Cerebral Malaria-Like Pathology in a Murine Borrelia and Plasmodium Co-Infection Model
Source: PubMed Central journal article supplement (PMC4116174; doi:10.1371/journal.pone.0103295), 2014-07-30
Supplement: pone.0103295.s008.pdf [file pone.0103295.s008.pdf]

Table S3. Wilcoxon rank test P-value comparisons in Figure 5

**Fq F4/80+/MHCII+**

| Timepoint | Cd0            | Bd1            | Bd2            | Bd3            | Bd5            | Md1            | Md2            | Md3            | Md5            | MBd1           | MBd2           | MBd3           | MBd5           |
|-----------|----------------|----------------|----------------|----------------|----------------|----------------|----------------|----------------|----------------|----------------|----------------|----------------|----------------|
| Cd0       | 1              | 0.09307        | <b>0.00216</b> | <b>0.00216</b> | <b>0.00216</b> | 0.06494        | <b>0.005</b>   | <b>0.00216</b> | <b>0.00866</b> | <b>0.01515</b> | <b>0.00216</b> | <b>0.00216</b> | <b>0.00216</b> |
| Bd1       | 0.09307        | 1              | <b>0.03704</b> | <b>0.01515</b> | <b>0.00216</b> | 0.58874        | <b>0.03671</b> | <b>0.02472</b> | 0.69913        | 0.30952        | <b>0.02597</b> | <b>0.04113</b> | <b>0.00216</b> |
| Bd2       | <b>0.00216</b> | <b>0.03704</b> | 1              | <b>0.00216</b> | <b>0.00216</b> | <b>0.01612</b> | 1              | 0.63036        | <b>0.01515</b> | <b>0.00216</b> | 0.81818        | <b>0.00216</b> | <b>0.01612</b> |
| Bd3       | <b>0.00216</b> | <b>0.01515</b> | <b>0.00216</b> | 1              | <b>0.00216</b> | <b>0.00216</b> | <b>0.005</b>   | <b>0.00216</b> | <b>0.00216</b> | <b>0.00216</b> | <b>0.00216</b> | 0.30952        | <b>0.00216</b> |
| Bd5       | <b>0.00216</b> | <b>0.00216</b> | <b>0.00216</b> | <b>0.00216</b> | 1              | <b>0.00216</b> | <b>0.005</b>   | <b>0.00216</b> | <b>0.00216</b> | <b>0.00216</b> | <b>0.00216</b> | <b>0.00216</b> | <b>0.00216</b> |
| Md1       | 0.06494        | 0.58874        | <b>0.01612</b> | <b>0.00216</b> | <b>0.00216</b> | 1              | <b>0.005</b>   | <b>0.00216</b> | 0.74835        | 0.48485        | <b>0.00216</b> | <b>0.00216</b> | <b>0.00216</b> |
| Md2       | <b>0.005</b>   | <b>0.03671</b> | 1              | <b>0.005</b>   | <b>0.005</b>   | <b>0.005</b>   | 1              | 0.68736        | <b>0.005</b>   | <b>0.005</b>   | 1              | <b>0.005</b>   | <b>0.02447</b> |
| Md3       | <b>0.00216</b> | <b>0.02472</b> | 0.63036        | <b>0.00216</b> | <b>0.00216</b> | <b>0.00216</b> | 0.68736        | 1              | <b>0.00216</b> | <b>0.00216</b> | 0.30952        | <b>0.00216</b> | <b>0.00216</b> |
| Md5       | <b>0.00866</b> | 0.69913        | <b>0.01515</b> | <b>0.00216</b> | <b>0.00216</b> | 0.74835        | <b>0.005</b>   | <b>0.00216</b> | 1              | 0.24026        | <b>0.00216</b> | <b>0.00216</b> | <b>0.00216</b> |
| MBd1      | <b>0.01515</b> | 0.30952        | <b>0.00216</b> | <b>0.00216</b> | <b>0.00216</b> | 0.48485        | <b>0.005</b>   | <b>0.00216</b> | 0.24026        | 1              | <b>0.00216</b> | <b>0.00216</b> | <b>0.00216</b> |
| MBd2      | <b>0.00216</b> | <b>0.02597</b> | 0.81818        | <b>0.00216</b> | <b>0.00216</b> | <b>0.00216</b> | 1              | 0.30952        | <b>0.00216</b> | <b>0.00216</b> | 1              | <b>0.00216</b> | <b>0.02597</b> |
| MBd3      | <b>0.00216</b> | <b>0.04113</b> | <b>0.00216</b> | 0.30952        | <b>0.00216</b> | <b>0.00216</b> | <b>0.005</b>   | <b>0.00216</b> | <b>0.00216</b> | <b>0.00216</b> | <b>0.00216</b> | 1              | <b>0.00216</b> |
| MBd5      | <b>0.00216</b> | <b>0.00216</b> | <b>0.01612</b> | <b>0.00216</b> | <b>0.00216</b> | <b>0.00216</b> | <b>0.02447</b> | <b>0.00216</b> | <b>0.00216</b> | <b>0.00216</b> | <b>0.02597</b> | <b>0.00216</b> | 1              |

**Fq F4/80+/MHCII+/MHCII<sup>high</sup>**

| Timepoint | Cd0            | Bd1            | Bd2            | Bd3            | Bd5            | Md1            | Md2            | Md3            | Md5            | MBd1           | MBd2           | MBd3           | MBd5           |
|-----------|----------------|----------------|----------------|----------------|----------------|----------------|----------------|----------------|----------------|----------------|----------------|----------------|----------------|
| Cd0       | 1              | <b>0.00216</b> | <b>0.00216</b> | <b>0.04113</b> | 0.42253        | 0.93723        | <b>0.02597</b> | 0.05424        | <b>0.00216</b> | <b>0.00433</b> | <b>0.00216</b> | <b>0.005</b>   | 0.58874        |
| Bd1       | <b>0.00216</b> | 1              | 0.06494        | <b>0.00216</b> | <b>0.00216</b> | <b>0.00216</b> | <b>0.02597</b> | <b>0.00216</b> | <b>0.00216</b> | 0.09307        | 0.33582        | <b>0.005</b>   | <b>0.00216</b> |
| Bd2       | <b>0.00216</b> | 0.06494        | 1              | <b>0.00216</b> | <b>0.00216</b> | <b>0.00216</b> | 0.24026        | <b>0.00866</b> | <b>0.00216</b> | 0.93723        | 0.81818        | <b>0.005</b>   | <b>0.00216</b> |
| Bd3       | <b>0.04113</b> | <b>0.00216</b> | <b>0.00216</b> | 1              | <b>0.02597</b> | 0.13203        | <b>0.00866</b> | <b>0.01515</b> | <b>0.00433</b> | <b>0.00216</b> | <b>0.00216</b> | 0.12754        | 0.69913        |
| Bd5       | 0.42253        | <b>0.00216</b> | <b>0.00216</b> | <b>0.02597</b> | 1              | 0.17965        | 0.06494        | 0.1994         | <b>0.00216</b> | <b>0.00216</b> | <b>0.00216</b> | <b>0.005</b>   | 0.14883        |
| Md1       | 0.93723        | <b>0.00216</b> | <b>0.00216</b> | 0.13203        | 0.17965        | 1              | <b>0.00866</b> | <b>0.02597</b> | <b>0.00216</b> | <b>0.00216</b> | <b>0.00216</b> | <b>0.02002</b> | 0.81818        |
| Md2       | <b>0.02597</b> | <b>0.02597</b> | 0.24026        | <b>0.00866</b> | 0.06494        | <b>0.00866</b> | 1              | 0.52111        | <b>0.00216</b> | 0.24026        | 0.17965        | <b>0.005</b>   | <b>0.00866</b> |
| Md3       | 0.05424        | <b>0.00216</b> | <b>0.00866</b> | <b>0.01515</b> | 0.1994         | <b>0.02597</b> | 0.52111        | 1              | <b>0.00216</b> | <b>0.02597</b> | <b>0.01515</b> | <b>0.005</b>   | <b>0.04113</b> |
| Md5       | <b>0.00216</b> | <b>0.00216</b> | <b>0.00216</b> | <b>0.00433</b> | <b>0.00216</b> | <b>0.00216</b> | <b>0.00216</b> | <b>0.00216</b> | 1              | <b>0.00216</b> | <b>0.00216</b> | <b>0.02002</b> | <b>0.01515</b> |
| MBd1      | <b>0.00433</b> | 0.09307        | 0.93723        | <b>0.00216</b> | <b>0.00216</b> | <b>0.00216</b> | 0.24026        | <b>0.02597</b> | <b>0.00216</b> | 1              | 0.69913        | <b>0.005</b>   | <b>0.00216</b> |
| MBd2      | <b>0.00216</b> | 0.33582        | 0.81818        | <b>0.00216</b> | <b>0.00216</b> | <b>0.00216</b> | 0.17965        | <b>0.01515</b> | <b>0.00216</b> | 0.69913        | 1              | <b>0.005</b>   | <b>0.00216</b> |
| MBd3      | <b>0.005</b>   | <b>0.005</b>   | <b>0.005</b>   | 0.12754        | <b>0.005</b>   | <b>0.02002</b> | <b>0.005</b>   | <b>0.005</b>   | <b>0.02002</b> | <b>0.005</b>   | <b>0.005</b>   | 1              | 0.37764        |
| MBd5      | 0.58874        | <b>0.00216</b> | <b>0.00216</b> | 0.69913        | 0.14883        | 0.81818        | <b>0.00866</b> | <b>0.04113</b> | <b>0.01515</b> | <b>0.00216</b> | <b>0.00216</b> | 0.37764        | 1              |

**Fq F4/80+/CD86+**

| Timepoint | Cd0            | Bd1            | Bd2            | Bd3            | Bd5            | Md1            | Md2            | Md3            | Md5            | MBd1           | MBd2           | MBd3           | MBd5           |
|-----------|----------------|----------------|----------------|----------------|----------------|----------------|----------------|----------------|----------------|----------------|----------------|----------------|----------------|
| Cd0       | 1              | 0.30952        | <b>0.00216</b> | <b>0.02597</b> | <b>0.00216</b> | 0.74835        | 0.09307        | 1              | <b>0.00216</b> | <b>0.01027</b> | <b>0.00216</b> | <b>0.04113</b> | 0.39394        |
| Bd1       | 0.30952        | 1              | <b>0.00433</b> | 0.13203        | <b>0.01515</b> | 0.58874        | 0.81818        | 0.39394        | 0.09307        | 0.06494        | <b>0.01515</b> | 0.06494        | 0.58874        |
| Bd2       | <b>0.00216</b> | <b>0.00433</b> | 1              | <b>0.00216</b> | <b>0.00216</b> | <b>0.00216</b> | <b>0.01027</b> | <b>0.00216</b> | 0.17965        | <b>0.00216</b> | 0.48485        | <b>0.00216</b> | <b>0.00216</b> |
| Bd3       | <b>0.02597</b> | 0.13203        | <b>0.00216</b> | 1              | <b>0.00866</b> | <b>0.01515</b> | <b>0.00866</b> | <b>0.02597</b> | <b>0.00216</b> | 0.30952        | <b>0.00216</b> | 0.06494        | 0.42253        |
| Bd5       | <b>0.00216</b> | <b>0.01515</b> | <b>0.00216</b> | <b>0.00866</b> | 1              | <b>0.00216</b> | <b>0.00216</b> | <b>0.00216</b> | <b>0.00216</b> | <b>0.00433</b> | <b>0.00216</b> | <b>0.00216</b> | <b>0.00216</b> |
| Md1       | 0.74835        | 0.58874        | <b>0.00216</b> | <b>0.01515</b> | <b>0.00216</b> | 1              | 0.1994         | 0.93723        | <b>0.01612</b> | <b>0.00866</b> | <b>0.00216</b> | 0.06494        | 0.39394        |
| Md2       | 0.09307        | 0.81818        | <b>0.01027</b> | <b>0.00866</b> | <b>0.00216</b> | 0.1994         | 1              | 0.09307        | 0.09307        | <b>0.00216</b> | <b>0.02597</b> | <b>0.00216</b> | 0.13203        |
| Md3       | 1              | 0.39394        | <b>0.00216</b> | <b>0.02597</b> | <b>0.00216</b> | 0.93723        | 0.09307        | 1              | <b>0.02472</b> | <b>0.00216</b> | <b>0.00433</b> | <b>0.02597</b> | 0.39394        |
| Md5       | <b>0.00216</b> | 0.09307        | 0.17965        | <b>0.00216</b> | <b>0.00216</b> | <b>0.01612</b> | 0.09307        | <b>0.02472</b> | 1              | <b>0.00216</b> | 0.58874        | <b>0.00216</b> | 0.06494        |
| MBd1      | <b>0.01027</b> | 0.06494        | <b>0.00216</b> | 0.30952        | <b>0.00433</b> | <b>0.00866</b> | <b>0.00216</b> | <b>0.00216</b> | <b>0.00216</b> | 1              | <b>0.00216</b> | <b>0.04113</b> | 1              |
| MBd2      | <b>0.00216</b> | <b>0.01515</b> | 0.48485        | <b>0.00216</b> | <b>0.00216</b> | <b>0.00216</b> | <b>0.02597</b> | <b>0.00433</b> | 0.58874        | <b>0.00216</b> | 1              | <b>0.00216</b> | <b>0.00866</b> |
| MBd3      | <b>0.04113</b> | 0.06494        | <b>0.00216</b> | 0.06494        | <b>0.00216</b> | 0.06494        | <b>0.00216</b> | <b>0.02597</b> | <b>0.00216</b> | <b>0.04113</b> | <b>0.00216</b> | 1              | 0.39394        |
| MBd5      | 0.39394        | 0.58874        | <b>0.00216</b> | 0.42253        | <b>0.00216</b> | 0.39394        | 0.13203        | 0.39394        | 0.06494        | 1              | <b>0.00866</b> | 0.39394        | 1              |

**Fq F4/80+/MHCII<sup>low</sup>/CD86+**

| Timepoint | Cd0            | Bd1            | Bd2            | Bd3            | Bd5            | Md1            | Md2            | Md3            | Md5            | MBd1           | MBd2           | MBd3           | MBd5           |
|-----------|----------------|----------------|----------------|----------------|----------------|----------------|----------------|----------------|----------------|----------------|----------------|----------------|----------------|
| Cd0       | 1              | 0.1994         | <b>0.00216</b> | <b>0.02472</b> | <b>0.005</b>   | <b>0.00216</b> | <b>0.00216</b> | <b>0.00216</b> | <b>0.005</b>   | <b>0.00216</b> | <b>0.03035</b> | 0.06494        | <b>0.005</b>   |
| Bd1       | 0.1994         | 1              | <b>0.01515</b> | 0.05424        | 0.06508        | <b>0.04113</b> | <b>0.01515</b> | <b>0.00866</b> | <b>0.0063</b>  | <b>0.01515</b> | 0.37764        | 0.06494        | <b>0.01291</b> |
| Bd2       | <b>0.00216</b> | <b>0.01515</b> | 1              | <b>0.00216</b> | <b>0.005</b>   | <b>0.00216</b> | <b>0.00216</b> | <b>0.00216</b> | 0.12754        | <b>0.00216</b> | 0.37764        | <b>0.00216</b> | <b>0.005</b>   |
| Bd3       | <b>0.02472</b> | 0.05424        | <b>0.00216</b> | 1              | 0.6884         | 0.74835        | 0.24026        | 0.17965        | <b>0.005</b>   | <b>0.01515</b> | <b>0.005</b>   | 0.06494        | 0.22895        |
| Bd5       | <b>0.005</b>   | 0.06508        | <b>0.005</b>   | 0.6884         | 1              | 0.5745         | 0.17122        | 0.12754        | <b>0.00492</b> | <b>0.04383</b> | <b>0.00492</b> | <b>0.00813</b> | 0.3768         |
| Md1       | <b>0.00216</b> | <b>0.04113</b> | <b>0.00216</b> | 0.74835        | 0.5745         | 1              | 0.17965        | 0.09307        | <b>0.005</b>   | <b>0.04113</b> | <b>0.005</b>   | 0.07765        | 0.22895        |
| Md2       | <b>0.00216</b> | <b>0.01515</b> | <b>0.00216</b> | 0.24026        | 0.17122        | 0.17965        | 1              | 0.24026        | <b>0.005</b>   | 0.24026        | <b>0.005</b>   | <b>0.00216</b> | 0.47039        |
| Md3       | <b>0.00216</b> | <b>0.00866</b> | <b>0.00216</b> | 0.17965        | 0.12754        | 0.09307        | 0.24026        | 1              | <b>0.005</b>   | 0.48485        | <b>0.005</b>   | <b>0.01515</b> | 0.80985        |
| Md5       | <b>0.005</b>   | <b>0.0063</b>  | 0.12754        | <b>0.005</b>   | <b>0.00492</b> | <b>0.005</b>   | <b>0.005</b>   | <b>0.005</b>   | 1              | <b>0.005</b>   | 0.06461        | <b>0.005</b>   | <b>0.00492</b> |
| MBd1      | <b>0.00216</b> | <b>0.01515</b> | <b>0.00216</b> | <b>0.01515</b> | <b>0.04383</b> | <b>0.04113</b> | 0.24026        | 0.48485        | <b>0.005</b>   | 1              | <b>0.005</b>   | <b>0.00216</b> | 0.6884         |
| MBd2      | <b>0.03035</b> | 0.37764        | 0.37764        | <b>0.005</b>   | <b>0.00492</b> | <b>0.005</b>   | <b>0.005</b>   | <b>0.005</b>   | 0.06461        | <b>0.005</b>   | 1              | <b>0.005</b>   | <b>0.00492</b> |
| MBd3      | 0.06494        | 0.06494        | <b>0.00216</b> | 0.06494        | <b>0.00813</b> | 0.07765        | <b>0.00216</b> | <b>0.01515</b> | <b>0.005</b>   | <b>0.00216</b> | <b>0.005</b>   | 1              | 0.06508        |
| MBd5      | <b>0.005</b>   | <b>0.01291</b> | <b>0.005</b>   | 0.22895        | 0.3768         | 0.22895        | 0.47039        | 0.80985        | <b>0.00492</b> | 0.6884         | <b>0.00492</b> | 0.06508        | 1              |

**Fq F4/80+/MHCII<sup>high</sup>/CD86+**

| Timepoint | Cd0     | Bd1     | Bd2            | Bd3            | Bd5            | Md1            | Md2            | Md3            | Md5            | MBd1           | MBd2              | MBd3         | MBd5    |
|-----------|---------|---------|----------------|----------------|----------------|----------------|----------------|----------------|----------------|----------------|-------------------|--------------|---------|
| Cd0       | 1       | 0.46883 | <b>0.00216</b> | <b>0.00216</b> | <b>0.00216</b> | <b>0.00216</b> | <b>0.00216</b> | <b>0.00866</b> | <b>0.00477</b> | 0.17273        | <b>0.00216</b>    | <b>0.005</b> | 0.33582 |
| Bd1       | 0.46883 | 1       | <b>0.005</b>   | <b>0.005</b>   | <b>0.005</b>   | <b>0.005</b>   | <b>0.005</b>   | <b>0.03671</b> | <b>0.0047</b>  | <b>0.03006</b> | <b>0.005&lt;/</b> |              |         |
